# Supplementary material
Source: publisher figshare collection journal article supplement (https://sage.figshare.com/ndownloader/files/14530391)
Supplement: Supplementary file 1 [file 14530391]

*******************************************************************************************************************************
****** Replication code for "Long-term Economic Distress, Cultural Backlash, and Support for Brexit" (aggregate analyses)******
*******************************************************************************************************************************
*******************************************************************************************************************************

*** AUHTORS CONTACT: **********************************
* Miguel Carreras
* University of California, Riverside
* Department of Political Science
* miguel.carreras@ucr.edu

* Yasemin Irepoglu Carreras
* University of California, Riverside
* Department of Political Science
* ycarre@ucr.edu

* Shaun Bowler
* University of California, Riverside
* Department of Political Science
* shaun.bowler@ucr.edu
******************************************************


*** Generation of pre-treatment variables***

gen log_gdhi_pc1997 = log(gdhi_pc1997)
gen pop_dens_1997 = (pop1997/area)
gen log_popdens1997 = log(pop_dens_1997)

*** Modification of variables for analysis***

gen log_gdhi_pc2015 = log(gdhi_pc2015)


***Table 1 (descriptive statistics)***

sum percent_leave if real_gdhi_change1997_2015 <15
sum percent_leave if real_gdhi_change1997_2015 <25 & real_gdhi_change1997_2015>15
sum percent_leave if real_gdhi_change1997_2015 <35 & real_gdhi_change1997_2015>25
sum percent_leave if real_gdhi_change1997_2015 <45 & real_gdhi_change1997_2015>35
sum percent_leave if real_gdhi_change1997_2015 >45


***First step ---> create spatial matrix***

spmatrix create contiguity W, rook

//Note: the file "Local_Authority_Districts_December_2016_Full_Clipped_Boundaries_in_Great_Britain_shp.dta" should be in the same folder as the main dataset for this estimation to work// 

***Figure 1 (Maps)***

*Panel A*

grmap percent_leave

*Panel B*

grmap real_gdhi_change1997_2015


***Table 2 (OLS models)***

*Model 1*
reg percent_leave real_gdhi_change2014_2015 log_popdens1997 perc_older_65_1997 log_gdhi_pc1997 perc_manufacturing1997, vce (cluster nuts2_code)
est stat

*Model 2*
reg percent_leave real_gdhi_change2005_2015 log_popdens1997 perc_older_65_1997 log_gdhi_pc1997 perc_manufacturing1997, vce (cluster nuts2_code)
est stat

*Model 3*
reg percent_leave real_gdhi_change1997_2015 log_popdens1997 perc_older_65_1997 log_gdhi_pc1997 perc_manufacturing1997, vce (cluster nuts2_code)
est stat


***Figure 2***
sum real_gdhi_change2005_2015
reg percent_leave real_gdhi_change2005_2015 log_popdens1997 perc_older_65_1997 log_gdhi_pc1997 perc_manufacturing1997, vce (cluster nuts2_code)
margins, at(real_gdhi_change2005_2015=(-10.723 -5.147 0.429 6.005 11.581))
marginsplot


***Table 4 (mediation analysis)***

*Δ in real household income 1997-2015*
medeff (regress cultural_grievances real_gdhi_change1997_2015 log_popdens1997 perc_older_65_1997 log_gdhi_pc1997 perc_manufacturing1997) (regress percent_leave real_gdhi_change1997_2015 cultural_grievances log_popdens1997 perc_older_65_1997 log_gdhi_pc1997 perc_manufacturing1997), med(cultural_grievances) treat(real_gdhi_change1997_2015) sims(1000) seed(1)

*Δ in unemployment 2004-2016*
medeff (regress cultural_grievances unemp_change2004_2016 log_popdens1997 perc_older_65_1997 log_gdhi_pc1997 perc_manufacturing1997) (regress percent_leave unemp_change2004_2016 cultural_grievances log_popdens1997 perc_older_65_1997 log_gdhi_pc1997 perc_manufacturing1997), med(cultural_grievances) treat(unemp_change2004_2016) sims(1000) seed(1)


***ONLINE APPENDIX***

***Table A1 (Spatial diagnostics tests)***
spatwmat, name(W) xcoord(_CX) ycoord(_CY) b(0 1)

reg percent_leave real_gdhi_change1997_2015 log_popdens1997 log_gdhi_pc1997, vce (cluster nuts2_code)
spatdiag,w(W)


***Table A2 (ML spatial error models)***

*Model 1*
spregress percent_leave real_gdhi_change2014_2015 log_popdens1997 perc_older_65_1997 log_gdhi_pc1997 perc_manufacturing1997, ml errorlag(W)
est stat

*Model 2*
spregress percent_leave real_gdhi_change2005_2015 log_popdens1997 perc_older_65_1997 log_gdhi_pc1997 perc_manufacturing1997, ml errorlag(W)
est stat

*Model 3*
spregress percent_leave real_gdhi_change1997_2015 log_popdens1997 perc_older_65_1997 log_gdhi_pc1997 perc_manufacturing1997, ml errorlag(W)
est stat


***Figure A1***
sum real_gdhi_change1997_2015
reg percent_leave real_gdhi_change1997_2015 log_popdens1997 perc_older_65_1997 log_gdhi_pc1997 perc_manufacturing1997, vce (cluster nuts2_code)
margins, at(real_gdhi_change1997_2015=(-2.311 9.103 20.517 31.931 43.345))
marginsplot


***Table A3 (robustness models)***

*Model 1*
reg percent_leave real_gdhi_change2014_2015 log_popdens perc_older_65_2015 log_gdhi_pc2015 manufacturing_jobs_percent percent_highschool perc_foreign_pop2015, vce (cluster nuts2_code)
est stat

*Model 2*
reg percent_leave real_gdhi_change2005_2015 log_popdens perc_older_65_2015 log_gdhi_pc2015 manufacturing_jobs_percent percent_highschool perc_foreign_pop2015, vce (cluster nuts2_code)
est stat

*Model 3*
reg percent_leave real_gdhi_change1997_2015 log_popdens perc_older_65_2015 log_gdhi_pc2015 manufacturing_jobs_percent percent_highschool perc_foreign_pop2015, vce (cluster nuts2_code)
est stat


*Table A4 (robustness models)*

*Model 1*
reg percent_leave real_compemp_change_2014_2015 log_popdens1997 perc_older_65_1997 log_gdhi_pc1997 perc_manufacturing1997, vce (cluster nuts2_code)
est stat

*Model 2*
reg percent_leave real_compemp_change_2005_2015 log_popdens1997 perc_older_65_1997 log_gdhi_pc1997 perc_manufacturing1997, vce (cluster nuts2_code)
est stat

*Model 3*
reg percent_leave real_compemp_change_1997_2015 log_popdens1997 perc_older_65_1997 log_gdhi_pc1997 perc_manufacturing1997, vce (cluster nuts2_code)
est stat


*Table A5 (robustness models)*

*Model 1*
reg percent_leave unemp_change2014_2016 log_popdens1997 perc_older_65_1997 log_gdhi_pc1997 perc_manufacturing1997, vce (cluster nuts2_code)
est stat

*Model 2*
reg percent_leave unemp_change2004_2016 log_popdens1997 perc_older_65_1997 log_gdhi_pc1997 perc_manufacturing1997, vce (cluster nuts2_code)
est stat


*Table A6 (robustness model)*

*Model 1*
reg percent_leave house_price_change2007_2016 log_popdens1997 perc_older_65_1997 log_gdhi_pc1997 perc_manufacturing1997, vce (cluster nuts2_code)
est stat


***Table A14 (mediation sensitivity analysis)***
drop _merge

*Δ in real household income 1997-2015*
medsens (regress cultural_grievances real_gdhi_change1997_2015 log_popdens1997 perc_older_65_1997 log_gdhi_pc1997 perc_manufacturing1997) (regress percent_leave real_gdhi_change1997_2015 cultural_grievances log_popdens1997 perc_older_65_1997 log_gdhi_pc1997 perc_manufacturing1997), eps(.01) med(cultural_grievances) treat(real_gdhi_change1997_2015) sims(1000)

*Δ in real household income 1997-2015*
medsens (regress cultural_grievances unemp_change2004_2016 log_popdens1997 perc_older_65_1997 log_gdhi_pc1997 perc_manufacturing1997) (regress percent_leave unemp_change2004_2016 cultural_grievances log_popdens1997 perc_older_65_1997 log_gdhi_pc1997 perc_manufacturing1997), eps(.01) med(cultural_grievances) treat(unemp_change2004_2016) sims(1000)


***Figure A2 (mediation sensitivity analysis)***

*Δ in real household income 1997-2015*
medsens (regress cultural_grievances real_gdhi_change1997_2015 log_popdens1997 perc_older_65_1997 log_gdhi_pc1997 perc_manufacturing1997) (regress percent_leave real_gdhi_change1997_2015 cultural_grievances log_popdens1997 perc_older_65_1997 log_gdhi_pc1997 perc_manufacturing1997), eps(.01) med(cultural_grievances) treat(real_gdhi_change1997_2015) sims(1000) graph

*Δ in real household income 1997-2015*
medsens (regress cultural_grievances unemp_change2004_2016 log_popdens1997 perc_older_65_1997 log_gdhi_pc1997 perc_manufacturing1997) (regress percent_leave unemp_change2004_2016 cultural_grievances log_popdens1997 perc_older_65_1997 log_gdhi_pc1997 perc_manufacturing1997), eps(.01) med(cultural_grievances) treat(unemp_change2004_2016) sims(1000) graph
